# Supplementary material
Source: publisher figshare collection journal article supplement (https://acs.figshare.com/ndownloader/files/10430454)
Supplement: Supplementary file 1 [file 10430454]

# Supporting Information

## **Simultaneous Multiselective Spectroelectrochemical Fiber-Optic Sensor: Sensing with an Optically Transparent Electrode**

Takuya Okazaki,<sup>†</sup> Eri Shiokawa,<sup>†</sup> Tatsuya Orii,<sup>†</sup> Takamichi Yamamoto,<sup>†</sup> Noriko Hata,<sup>†</sup> Akira Taguchi,<sup>‡</sup> Kazuharu Sugawara,<sup>§</sup> and Hideki Kuramitz<sup>\*,†</sup>

<sup>†</sup>Department of Environmental Biology and Chemistry, Graduate School of Science and Engineering for Research, University of Toyama, 3190 Gofuku, Toyama 930-8555, Japan

<sup>‡</sup>Hydrogen Isotope Science Research Center, University of Toyama, 3190 Gofuku, Toyama 930-8555, Japan

<sup>§</sup>Maebashi Institute of Technology, Maebashi, Gunma 371-0816, Japan

### **Corresponding Author**

\*E-mail: kuramitz@sci.u-toyama.ac.jp. Tel. & Fax: +81 76 445 6669

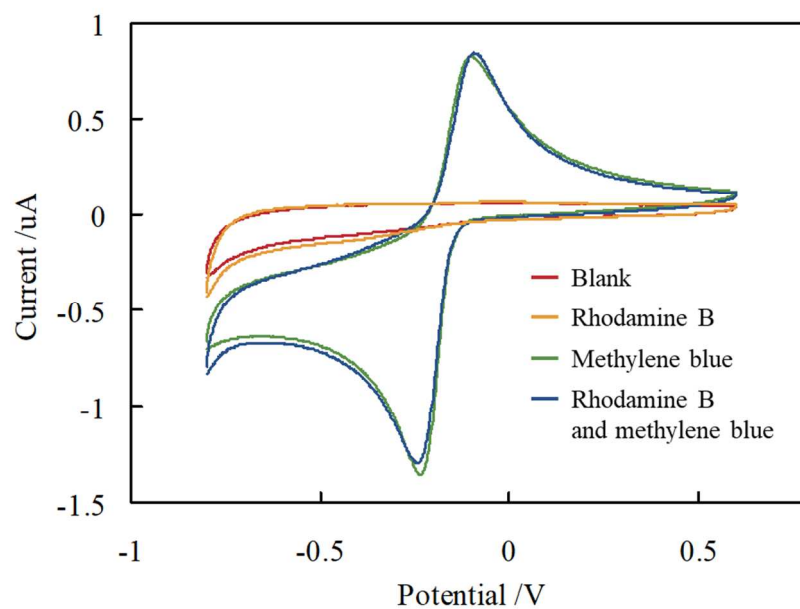

**Figure S-1.** Cyclic voltammograms of 100  $\mu\text{M}$  rhodamine B, 50  $\mu\text{M}$  methylene blue, and their mixture using a commercial ITO electrode. The measurements were performed at a scan rate of 50 mV/s.
